# PSYCHIATRIC SERVICES

Subscribe today to APA's  
high-ranking mental health policy  
and services journal!

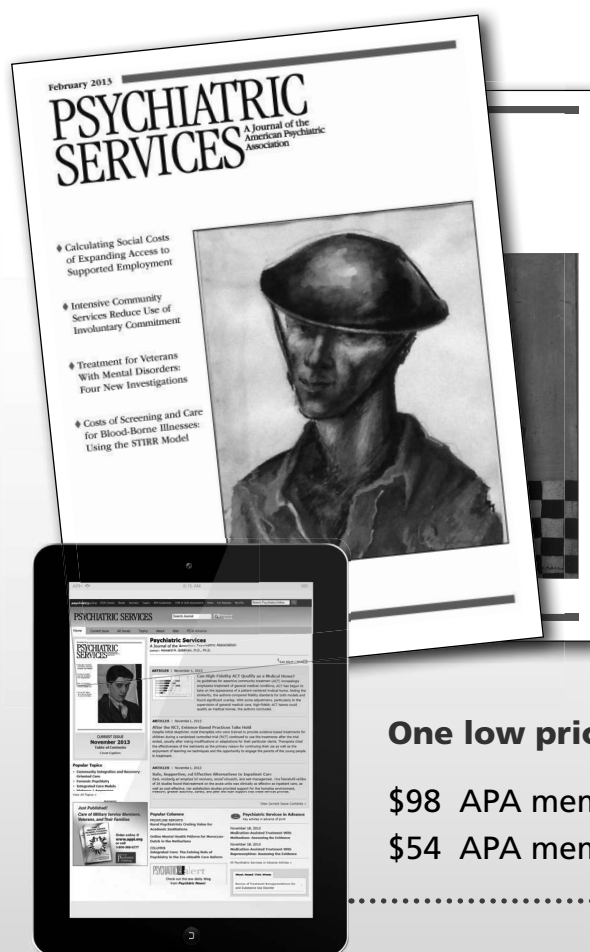

## Don't miss the January issue:

- Assessing the Evidence Base Series launch
- E-mental health care: two literature reviews
- Gun restriction policies and serious mental illness

## Coming in the February issue:

- Methadone and buprenorphine: a look at the evidence
- Illness management and recovery: a literature review
- Geographic variation in U.S. clozapine use

**One low price covers your print and online subscription.**

**\$98** APA member print and online subscription.

**\$54** APA member online-only subscription.

Don't miss another issue of *Psychiatric Services*.

Subscribe today, visit [www.appi.org](http://www.appi.org) or call Customer Service at 1-800-368-5777

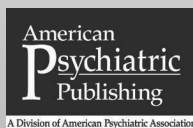

ISSN 1075-2730 • [ps.psychiatryonline.org](http://ps.psychiatryonline.org)

[www.appi.org](http://www.appi.org) • 1-800-368-5777 • Fax: 703-907-1091 • Email: [appi@psych.org](mailto:appi@psych.org)

Priority Code AH1402FEB

# Integrated Care Systems

*Psychiatric News* features highly informative content on the emerging practice model of integrated care.

Learn about:

- Predominant models of integrated care and the role psychiatrists play
- Working in integrated care settings
- Payment and delivery models
- APA resources on integrated care and delivery systems initiatives

For new psychiatrists entering the field, understanding the key role of systems of care has never been more important. Research published each month in *Psychiatric Services* will help residents play a vital role in the systems of care where they work, which is why the American Psychiatric Association provides psychiatric residents who are APA Members-in-Training full-text online access to *Psychiatric Services* content as a benefit.

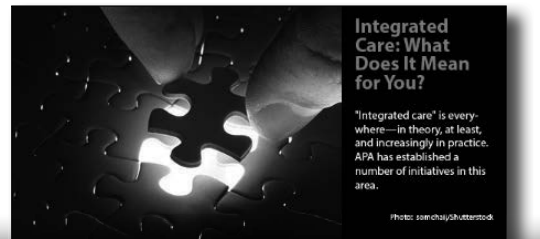

The screenshot shows the Psychiatric News website interface. At the top, there is a navigation bar with links for 'psychiatryonline', 'DSM Library', 'Books', 'Journals', 'Topics', 'APA Guidelines', 'CME &amp; Self-Assessment', 'News', 'For Patients', 'My POL', and a search box. Below this is the main header with the title 'PSYCHIATRIC NEWS' and the subtitle 'From The American Psychiatric Association'. A search bar is also present. The main content area displays the article 'Integrated Care: What Does It Mean for You?' dated September 20, 2013. The article includes a quote: '"Integrated care" is everywhere—in theory, at least, and increasingly in practice. The concept is a feature of the delivery-system improvements in the new health care reform law, and policymakers and many clinicians have converged on the idea that general medical and behavioral health services should be brought together in a patient-centered manner. Today, a small but dedicated and growing cadre of psychiatrists is advancing the cause of integrated care and the participation of psychiatrists in collaborative-care models.' The article also mentions that APA has established a number of initiatives in this area, headed up by the Work Group on Integrated Care of the Council on Healthcare Systems and Financing, chaired by Lori Raney, M.D., and the Board of Trustees Health Care Reform Strategic Action Work Group, chaired by Howard Goldman, M.D. The article is categorized under 'Professional News' and includes options to print, email, share, or reprint. On the right side of the page, there are advertisements for 'Clinical Guide to DEPRESSION and BIPOLAR DISORDER' and 'A daily "pearl" is just Clinical wisdom gleaned from The American Journal of Psychiatry. Visit AJPClinical.' Below the article, there is a 'Related Articles' section with links to 'Integrated Care FAQ Answers', 'Why the IPS is a Can't-Miss Meeting', and 'Clinicians in DSM-5 Field Trials Have Revisions'. At the bottom of the page, there is a 'PSYCHIATRIC' logo.

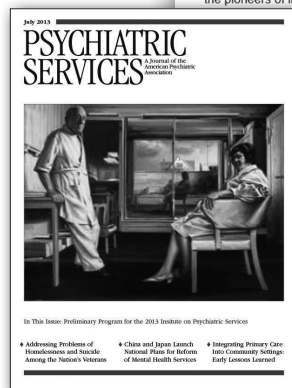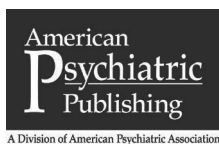

psychnews.psychiatryonline.org  
www.appi.org • 1-800-368-5777 • Email: appi@psych.org

Priority Code AH1329

# THE AMERICAN JOURNAL OF PSYCHIATRY

## The most widely read psychiatric journal in the world!

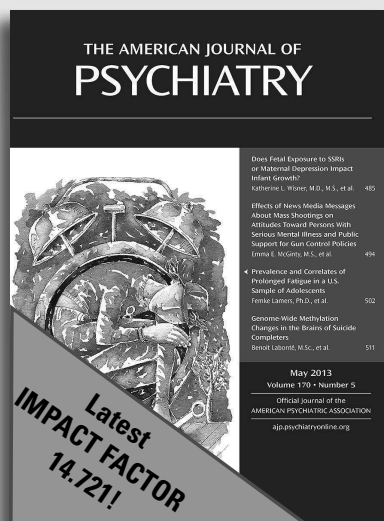

- *The American Journal of Psychiatry* (AJP) latest Impact Factor is 14.721, a nearly 2 point rise from last year's 12.759 according to the recently released 2012 Journal Citation Reports® (Thomson Reuters, 2013). AJP, a publication of the American Psychiatric Association, ranks second among 135 journals in psychiatry.
- *The American Journal of Psychiatry* is again among the top journals in psychiatry in terms of immediacy according to Thomson Scientific's Immediacy Index. This important performance metric is a good measure of how quickly a given journal's articles are cited—AJP's placement is a result of publishing articles that are relevant, covering current "hot" topics and cutting-edge research, and getting these findings to the field faster with AJP in Advance, the Journal's online-ahead-of-print publication protocol.
- And, as it has for many years, AJP remains far and away the leader among psychiatric publications in total citations. It's 42,730 citation count was almost 5,000 citations above the next publication.

- The editors of *Journal Watch Psychiatry* announced the top psychiatry stories of 2012. Four articles from *The American Journal of Psychiatry* were honored:
  - Metformin for Antipsychotic-Induced Adverse Effects in Women With Schizophrenia (Am J Psychiatry 2012;169:813-821.)
  - Creatine Augmentation of SSRIs for Depression (Am J Psychiatry 2012;169:937-945)
  - Antipsychotics Vary in Mortality Risk in Dementia Patients (Am J Psychiatry 2012;169:71-79.)
  - Tools for Preventing Postpartum Psychosis and Mania (Am J Psychiatry 2012;169:609-615)

### No other journal had more than one article in the top stories.

- A poll conducted by the BioMedical & Life Sciences Division of The Special Libraries Association identified the 100 most influential journals in all of Biology & Medicine over the last 100 years. *The American Journal of Psychiatry* was among those honored, the only psychiatry/psychology journal represented.

ISSN 0002-953X • [ajp.psychiatryonline.org](http://ajp.psychiatryonline.org)

For subscription information email [institutions@psych.org](mailto:institutions@psych.org), or call 703-907-8538

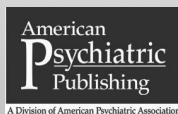

The *First* and *Last* Word in Psychiatry  
[www.appi.org](http://www.appi.org) • 1-800-368-5777 • 703-907-7322

AH1303R

# American Neuropsychiatric Association

The American Neuropsychiatric Association (ANPA), established in 1988, is an organization of professionals in neuropsychiatry, behavioral neurology, neuropsychology and the clinical neurosciences. Our mission is to improve the lives of people with disorders at the interface of psychiatry and neurology.

One strength of our organization is our diverse membership, which is comprised of professionals in all areas of neuroscience who share clinical and/or academic interests in neuropsychiatry. The interdisciplinary makeup of the membership encourages collaboration among educators, clinicians, researchers, students and trainees during research presentations, symposia, workshops, and continuing education courses. *The Journal of Neuropsychiatry and Clinical Neurosciences (JNCN)* is the official publication of the organization, and a subscription is a benefit of membership.

ANPA holds an annual scientific meeting and provides up to 30 CME/CE credits. Members are encouraged to submit their work for presentation at our annual meetings. Travel awards are available for promising young investigators. Annual meeting abstracts and proceedings are published in *JNCN*.

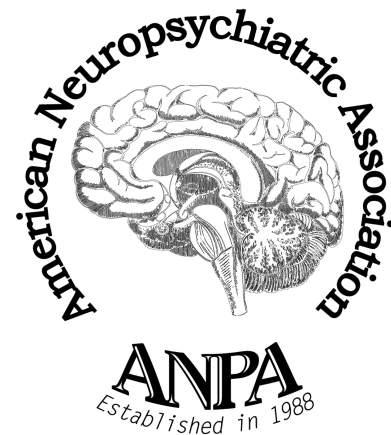

## Contact Information

### Benefits of Membership

- Subscription to *The Journal of Neuropsychiatry and Clinical Neurosciences (JNCN)*
- Discounts on subscriptions to PsychiatryOnline.com including DSM Premium and DSM Premium Plus
- Opportunities for presenting at the annual meeting with accepted abstracts published in the *JNCN*
- Significantly reduced registration fees at the annual meeting
- Newsletters, news updates, information on job and training opportunities, research and meeting information on the ANPA web site: [www.anpaonline.org](http://www.anpaonline.org)
- Discounted membership and meeting registration fees for trainees
- Collaboration in clinical, educational and research activities with opportunities to interact with leaders in the field

Website:  
[www.anpaonline.org](http://www.anpaonline.org)

Email:  
[anpa@osu.edu](mailto:anpa@osu.edu)

Phone:  
614-447-2077

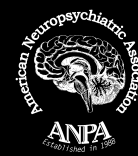

**Don't miss ANPA's 25<sup>th</sup>  
Annual Meeting**

**Sheraton Seattle Hotel  
Seattle, Washington**

**February 15-18, 2014**

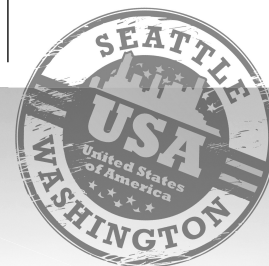

Seattle Washington USA  
February 15-18, 2014

Join online at: [www.anpaonline.org](http://www.anpaonline.org)

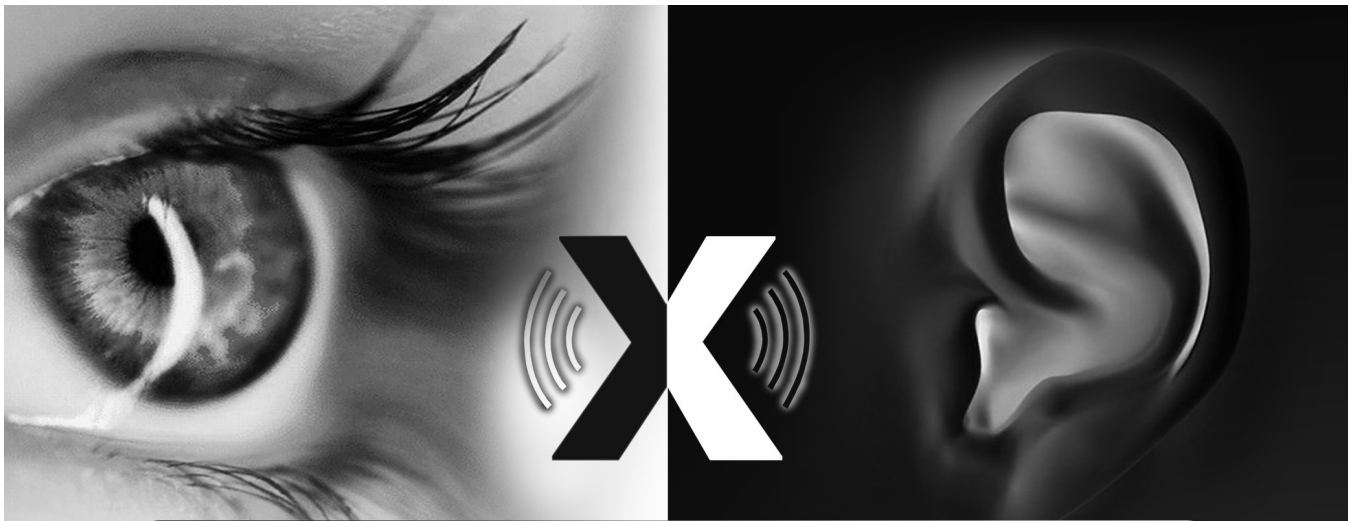

# Performance You Can See & Hear

Exclusively from  MHS

## CONNERS CPT 3™

Conners Continuous  
Performance Test 3™  
[MHS.com/CPT3](http://MHS.com/CPT3)

## CONNERS CATA™

Conners Continuous  
Auditory Test of Attention™  
[MHS.com/CATA](http://MHS.com/CATA)

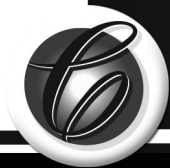

Evaluate attention disorders and neurological functioning with the Conners Continuous Performance Tests, now with both visual and auditory attention assessments.

- A comprehensive evaluation with the introduction of an auditory attention test
- Easy interpretation with new reports offering clear visuals & summaries
- Trusted results with the most representative CPT normative samples collected
- Diagnostic confidence with a refined measurement of attention & new scores

**Order by May 1st to Save 10% on all  
Conners CPT 3/CATA Combo Kits!**

**Coming  
Early  
Spring**

 **MHS**  
ASSESSMENTS

**Multi-Health Systems Inc.**  
USA Tel: 1.800.456.3003 / CAN Tel: 1.800.268.6011  
[mhs.com](http://mhs.com) • [customerservice@mhs.com](mailto:customerservice@mhs.com)
