# THE JOURNAL OF NEUROPSYCHIATRY and Clinical Neurosciences

The Official Journal of the American Neuropsychiatric Association

## In this issue:

- Volume Transmission in the Brain: Beyond the Synapse
- Risk Factors for Psychosis Secondary to Temporal Lobe Epilepsy: A Systematic Review
- Prazosin for Military Combat-Related PTSD Nightmares: A Critical Review
- Patterns of Cortico-Limbic Activations During Visual Processing of Sad Faces in Depression Patients: A Coordinate-Based Meta-Analysis
- Impulsiveness in Professional Fighters

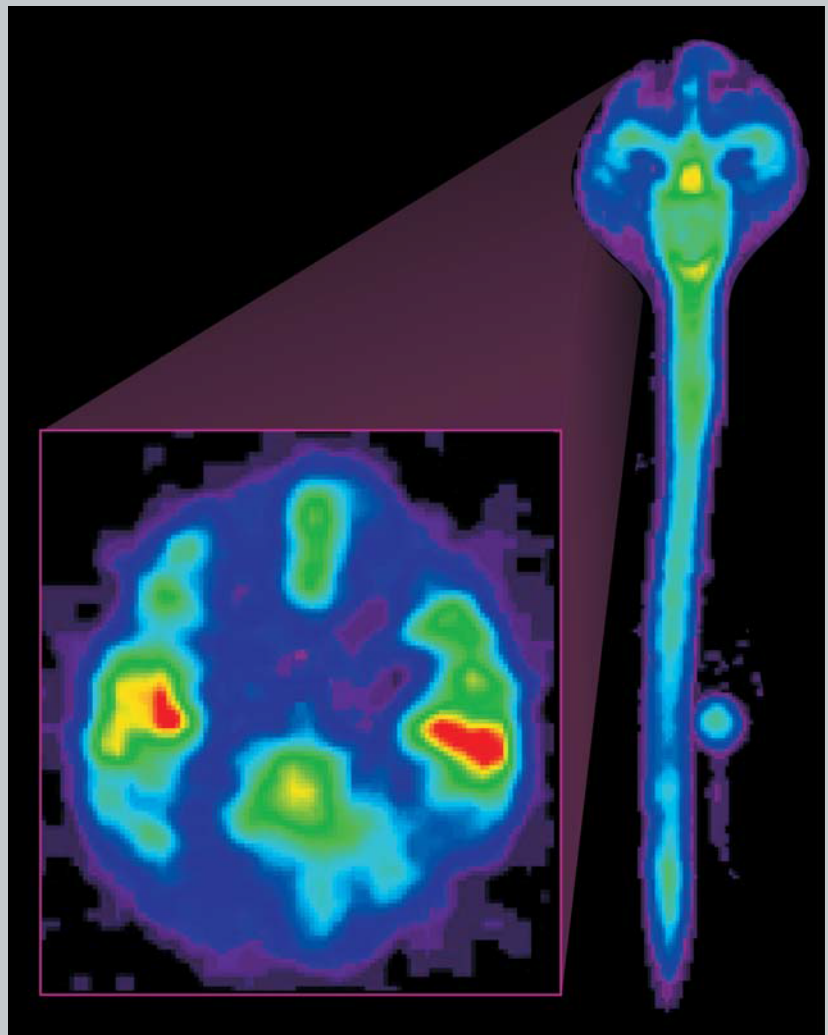

Source: https://psychiatryonline.org/doi/suppl/10.1176/jnp.2014.26.issue-1/suppl_file/cover.pdf
