# American Neuropsychiatric Association

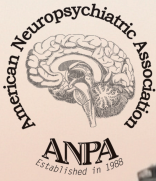

Sheraton Seattle Hotel  
February 15-18, 2014

## Seattle Washington USA

Meeting Information available at [www.anpaonline.org](http://www.anpaonline.org)

For questions, contact the American Neuropsychiatric Association office at: Phone: 614-447-2077 • E-mail: [anpa@osu.edu](mailto:anpa@osu.edu)

# 25<sup>th</sup> Annual Meeting

## THEME: Molecular Mechanisms in Neuropsychiatry

### PRE-MEETING SYMPOSIA

**February 15, 2014, 2:00 – 5:45 pm**

*FUNCTIONAL NEUROIMAGING: A REVIEW OF CURRENT AND FUTURE CLINICAL TECHNIQUES*

Robin A. Hurlley, MD, Stephen R. Dager, MD, Shane C. Masters, MD, PhD

**February 16, 2014, Morning**

*SOCIETY FOR BEHAVIORAL AND COGNITIVE NEUROLOGY SYMPOSIUM*

*Frontotemporal Dementia*

Daniel I. Kaufer, MD, Donald Eknoyan, MD, Mario F. Mendez, MD, PhD

### 25TH ANNUAL MEETING

**February 16, 2014, Afternoon**

*PRESIDENT'S SYMPOSIUM*

*Virtual Reality In Neuropsychiatric Rehabilitation*

Albert "Skip" Rizzo PhD

*Interactive Neurotechnology and the Treatment of Psychiatric Illness*

Sophia Vinogradov, MD

*CNPA-PETER BASSOE LECTURE*

*Primary Progressive Aphasia and The Language Network*

M-Marsel Mesulam, MD

**February 17, 2014, Morning**

*RESEARCH REPORT*

*Mild Cognitive Impairment*

Yonas E. Geda, MD, MSc

*MOLECULAR MECHANISMS IN NEUROPSYCHIATRY SYMPOSIUM I*

*Movement Dysfunctions in Complex*

*Neuropsychiatric Disorders*

Wai Lun Alan Fung, MD, ScD, Shawn F. Smyth, MD, Nancy J. Butcher, MSc

*The Many Neuropsychiatric Faces of Pediatric Autoimmune Encephalitis*

Scott Carroll, MD, Sue B. Turkel, MD, Jay A. Salpekar, MD

**February 17, 2014 Afternoon**

*CLINICAL AND RESEARCH*

*PLATFORM SESSIONS*

Sheldon Benjamin, MD, Jeremy D. Schmahmann, MD

*POSTER SESSION I*

**February 18, 2014, Morning**

*MOLECULAR MECHANISMS IN NEUROPSYCHIATRY SYMPOSIUM II*

*Genetic and Molecular Underpinnings of Frontotemporal Lobar Degeneration and Related Neurodegenerative Disorders*

Bruce L. Miller, MD

*Demystifying FTD Pathology*

Lea T. Grinberg, MD, PhD

*Immune Mechanisms In FTD: Chronic Inflammation as A Risk For FTLT-DP*

Zachary A. Miller, MD

**February 18, 2014 Afternoon**

*MOLECULAR MECHANISMS IN NEUROPSYCHIATRY SYMPOSIUM III*

*Molecularly-Targeted Treatments for FTD And Related Neurodegenerative Disorders*

Adam L. Boxer, MD, PhD

*Substance Abuse Vaccines: Progress and Problems*

Frank M. Orson, MD

*Molecular Mechanisms Of Neurostimulation*

Ziad H. Nahas, MD, MSCR

*POSTER SESSION II*

*25TH ANNUAL MEETING CELEBRATION, AWARD PRESENTATION AND BANQUET*

*Presidential Address*

Sheldon Benjamin, MD

Meeting information can be found on the ANPA web site:

[www.anpaonline.org](http://www.anpaonline.org)

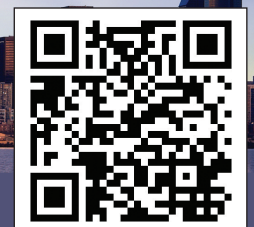

# THE JOURNAL OF NEUROPSYCHIATRY and Clinical Neurosciences

The Official Journal of the American Neuropsychiatric Association

**Stuart C. Yudofsky, M.D.**  
*Editor*

**David B. Arciniegas, M.D.**  
**Robert E. Hales, M.D., M.B.A.**  
*Deputy Editors*

**T. Angelita Garcia, M.B.A.**  
*Assistant to the Editors*

#### **Consulting Editors**

Floyd Bloom, M.D.  
Edward G. Jones, M.D., Ph.D.  
Eric R. Kandel, M.D.  
Henry Nasrallah, M.D.  
Solomon H. Snyder, M.D.

#### **Associate Editors**

Nancy C. Andreasen, M.D., Ph.D.  
Nashaat N. Boutros, M.D.  
C. Edward Coffey, M.D.  
Joseph T. Coyle, M.D.  
Jeffrey L. Cummings, M.D.  
Michael Ebert, M.D.  
Dwight L. Evans, M.D.  
Robert C. Green, M.D.  
Edward C. Lauterbach, M.D.  
Thomas W. McAllister, M.D.  
John M. Morihisa, M.D.

Charles Nemeroff, M.D., Ph.D.  
Thomas C. Neylan, M.D.  
Trevor R. P. Price, M.D.  
Robert G. Robinson, M.D.  
Stephen Salloway, M.D., M.S.  
Randolph B. Schiffer, M.D.  
Jonathan M. Silver, M.D.  
Robert Stern, Ph.D.  
Paula T. Trzepacz, M.D.  
Daniel R. Weinberger, M.D.

#### **Neuropsychiatric Practice and Opinion Editor**

Fred Ovsiew, M.D.

#### **Neuropsychiatry Classics Editor**

Thomas C. Neylan, M.D.

#### **Book Review Editor**

Paula T. Trzepacz, M.D.

#### **Windows to the Brain Editors**

Robin A. Hurley, M.D.  
L. Anne Hayman, M.D.  
Katherine H. Taber, Ph.D.

#### **Research and Statistical Design Consultants**

Douglas Mossman, M.D.  
Eugene Somoza, M.D., Ph.D.

#### **American Psychiatric Publishing**

Rebecca D. Rinehart  
*Publisher*

Michael Roy  
*Editorial Director, Journals*

Angela Moore  
*Editorial Manager*

Wendy Lieberman Taylor  
*Production Manager*

Y. Nicole Gray  
*Editorial Support Services Manager*

Patrick Hansard  
*Director of Marketing and Sales*

Christopher Keene  
*Sales Manager*  
(703) 907-8538

Roger Domras  
*Director of Fulfillment and Circulation*

*The Journal of Neuropsychiatry and Clinical Neurosciences*, (ISSN 0895-0172), is published quarterly by the American Psychiatric Association (APA), 1000 Wilson Blvd., Suite 1825, Arlington, VA 22209. Copyright © 2014 American Psychiatric Association. *The Journal of Neuropsychiatry and Clinical Neurosciences* is protected by copyright and may not be reproduced in any manner without written permission. *The Journal of Neuropsychiatry and Clinical Neurosciences* is abstracted/indexed in *Chemical Abstracts*, *Current Contents/Clinical Medicine*<sup>®</sup>, *EMBASE/Excerpta Medica*, *Index Medicus/MEDLINE/MEDLARS*, *PsycINFO*, *Psychological Abstracts*, *Research Alert*<sup>®</sup>, and *Sci Search*<sup>®</sup>. It is available through University Microfilms, Inc., 300 North Zeeb Road, Ann Arbor, MI 48106, in microform, electronic, or paper format.

Manuscript submissions should no longer be sent by mail. Please visit <http://mc.manuscriptcentral.com> to upload a paper online.

U.S. subscriptions are \$229 per year (4 issues) individual; \$183 for APA members; international subscriptions are \$345 per year. APA Members receive 20% discount off regular individual subscription rate. Institutional Subscriptions are tier priced. For institutional site license information and pricing, please email us at [appi@psych.org](mailto:appi@psych.org), call (800) 368-5777 or visit [www.appi.org/ForLibrarians/](http://www.appi.org/ForLibrarians/). *The Journal of Neuropsychiatry and Clinical Neurosciences*, 1000 Wilson Blvd., Suite 1825, Arlington, VA 22209.

Advertising inquiries may be directed to Tim Wolfinger at PMI, 30 East 33rd St., New York, NY 10016; (212) 904-0379; [twolfinger@pminy.com](mailto:twolfinger@pminy.com).

APA is not responsible for statements made in this publication by contributors or advertisers. Unless stated, material in *The Journal of Neuropsychiatry and Clinical Neurosciences* does not reflect the endorsement, official attitude, or position of APA or the American Neuropsychiatric Association.

Periodicals postage paid at Arlington, VA, and additional mailing offices. POSTMASTER: Send address changes to *The Journal of Neuropsychiatry and Clinical Neurosciences*, 1000 Wilson Blvd., Suite 1825, Arlington, VA 22209.

American  
**Psychiatric**  
Publishing

A Division of American Psychiatric Association

Please visit the Journal's web site at <http://neuro.psychiatryonline.org>
